# Supplementary material for: A Diverging Species within the Stewartia gemmata (Theaceae) Complex Revealed by RAD-Seq Data
Source: MDPI journal article supplement (doi:10.3390/plants13101296), 2024-05-08
Supplement: s1 [file s1]

Table S1 Morphological characters, distribution areas, and taxonomic treatments of the *Stewartia gemmata* complex

| Basionym                                       | Publication                                                        | Distribution area                                                                                  | Bark characters                                   | Bracteole and sepal characters                                                                                                 | A systematic study on the genera <i>Stewartia</i> and <i>Hartia</i> (Theaceae) (Li, 1996)                 | <i>Flora of China</i> (Ming and Bartholomew, 2007) | <i>New Edition of Flora of Zhejiang</i> (Chen, 2021) |
|------------------------------------------------|--------------------------------------------------------------------|----------------------------------------------------------------------------------------------------|---------------------------------------------------|--------------------------------------------------------------------------------------------------------------------------------|-----------------------------------------------------------------------------------------------------------|----------------------------------------------------|------------------------------------------------------|
| <i>S. gemmata</i> S. S. Chien & W. C. Cheng    | Contrib. from Biol. Lab. Sci. Soc. China Bot. Ser. 1931, 6, 66–69. | eastern to southern China (mainly Zhejiang, Anhui, Jiangxi, Fujian, Hunan, Guangxi, and Guangdong) | exfoliations yellowish or grayish and hard papery | Leaflike, ovate, long ovate, or ovate-lanceolate, apex acute to acuminate.                                                     | Treated as a synonym of <i>S. sinensis</i> var. <i>sinensis</i> but was resurrected by Lin et al. (2022). | Followed Li (1996)                                 | Treated as <i>S. gemmata</i> .                       |
| <i>S. brevicalyx</i> S. Z. Yan                 | Acta Phytotaxon. Sin. 1981, 19, 462–471.                           | Mt. Tianmu (northern Zhejiang) and its adjacent areas                                              | exfoliations yellowish or grayish and hard papery | Not leaflike, bracteoles broadly ovate to subcordate and apex obtuse, outer two sepals orbicular or reniform and apex rounded. | Treated as <i>S. sinensis</i> var. <i>brevicalyx</i> .                                                    | Followed Li (1996)                                 | Treated as a synonym of <i>S. gemmata</i> .          |
| <i>S. acutisepala</i> P. L. Chiu & G. R. Zhong | Plant Divers. 1988, 10, 1–3.                                       | southern Zhejiang of eastern China                                                                 | exfoliations reddish-brown and membranous         | Leaflike, ovate, long ovate, or ovate-lanceolate, apex acute to acuminate.                                                     | Treated as <i>S. sinensis</i> var. <i>acutisepala</i> .                                                   | Followed Li (1996)                                 | Treated as <i>S. acutisepala</i> .                   |

Table S2 Summary statistics of assembled loci among 11 accessions

| Accession ID | Reads mapped to reference | Total clusters | Loci in assembly |
|--------------|---------------------------|----------------|------------------|
| acu1         | 165851                    | 41360          | 2515             |
| acu2         | 637969                    | 90495          | 9410             |
| acu3         | 487360                    | 90398          | 7774             |
| acu4         | 647343                    | 106318         | 9045             |
| acu5         | 598449                    | 101785         | 8762             |
| gem1         | 283434                    | 63891          | 4788             |
| gem2         | 389016                    | 83033          | 5542             |
| gem3         | 463720                    | 83984          | 7677             |
| gem4         | 281430                    | 64553          | 4163             |
| gem5         | 209144                    | 47039          | 3201             |
| mon          | 296416                    | 62561          | 4537             |

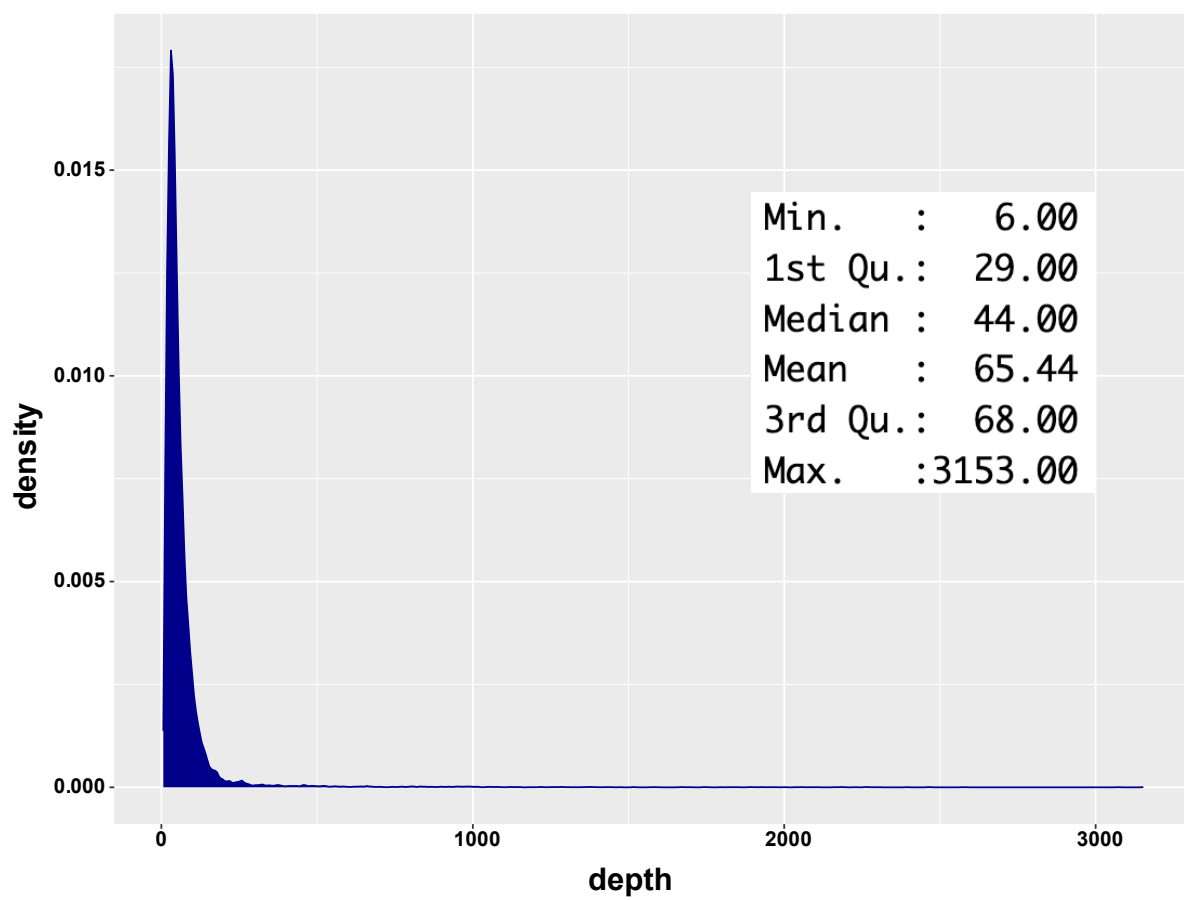

Figure S1 The site depth summary of SNPs generated from the ipyrad pipeline
